# Supplementary material for: Acetylated tau destabilizes the cytoskeleton in the axon initial segment and is mislocalized to the somatodendritic compartment
Source: PubMed Central journal article supplement (PMC4928318; doi:10.1186/s13024-016-0109-0), 2016-06-29

Table S1  
 AD human brain samples from superior temporal gyrus

| Case number | Braak | Plaque load (#plaques/mm <sup>2</sup> ) | Postmortem intervals (hr) |
|-------------|-------|-----------------------------------------|---------------------------|
| 2010        | 0     | 0                                       | 18                        |
| 1248        | 0     | 0                                       | 16.8                      |
| 1036        | 0     | 0                                       | 4.2                       |
| 1004        | 1     | 0                                       | 5                         |
| 1180        | 1     | 0                                       | 28.3                      |
| 1028        | 1     | 0                                       | 40.9                      |
| 1279        | 2     | 0                                       | 21.7                      |
| 546         | 2     | 0                                       | 4.8                       |
| 1040        | 2     | 0                                       | 4.8                       |
| 776         | 2     | 0                                       | 4.1                       |
| 1088        | 2     | 0                                       | 14.9                      |
| 625         | 5     | 0.4                                     | 7.1                       |
| 399         | 5     | 9.7                                     | 3                         |
| 247         | 5     | 8.4                                     | 7.3                       |
| 326         | 5     | 25.2                                    | 2.9                       |
| 675         | 5     | 18.4                                    | 2.2                       |
| 9           | 5     | 15.6                                    | 1.8                       |
| 607         | 6     | 7.6                                     | 3.9                       |
| 611         | 6     | 3.04                                    | 1.5                       |
| 1203        | 6     | 6.4                                     | 3                         |
| 736         | 6     | 9.2                                     | 4.3                       |
| 649         | 6     | 10.8                                    | 7.3                       |
| 992         | 6     | 6                                       | 3.3                       |
| 505         | 6     | 12                                      | 3.3                       |
| 350         | 6     | 13.2                                    | 3.5                       |
| 697         | 6     | 9.2                                     | 12.3                      |

Figure S1

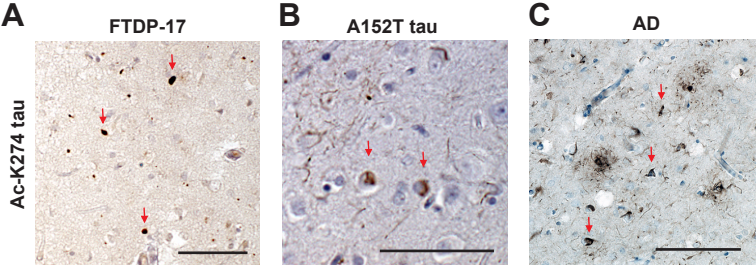

Figure S2

A

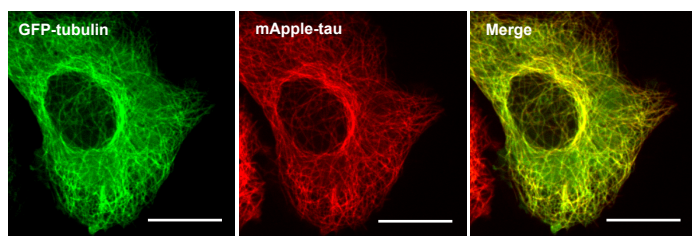

B

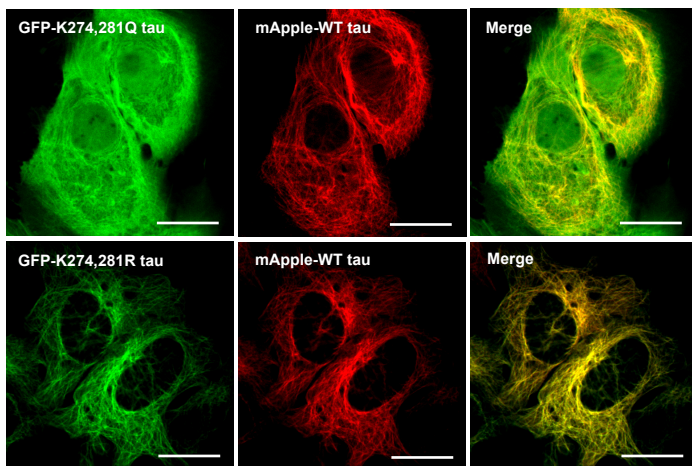

C

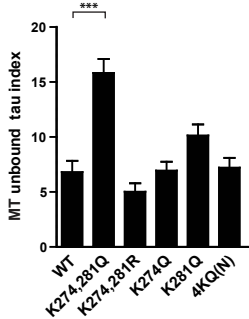

D

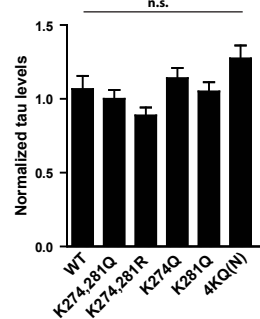

Figure S3

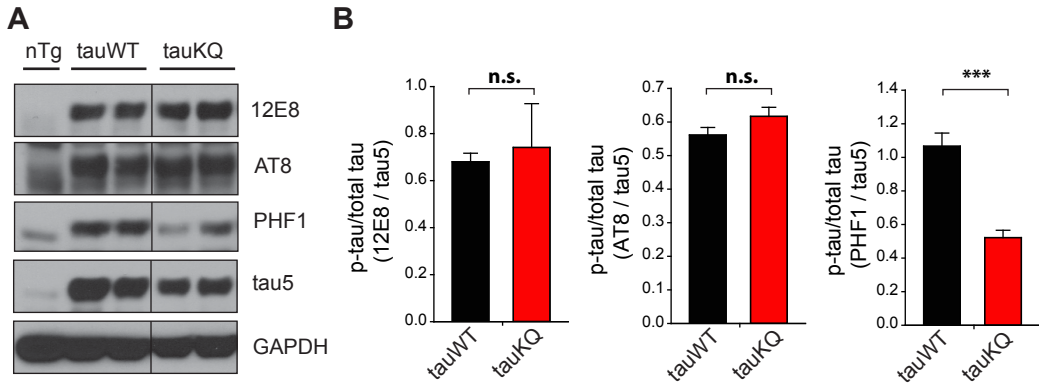

Supplement: 13024_2016_109_MOESM1_ESM.pdf [file 13024_2016_109_MOESM1_ESM.pdf]
